# Supplementary material for: Insights into structural and dynamical features of water at halloysite interfaces probed by DFT and classical molecular dynamics simulations
Source: Royal Society of Chemistry journal article supplement (doi:10.1039/c5cp05920h), 2015-12-01
Supplement: c5cp05920h1.pdf [file c5cp05920h1.pdf]

## **Electronic Supplementary Information**

for

**Insights on structural and dynamical features of water at halloysite**

**interfaces probed by DFT and Classical Molecular Dynamics**

**Simulations.**

Davide Presti<sup>1</sup>, Alfonso Pedone<sup>1\*</sup>, Giordano Mancini,<sup>2\*</sup> Celia Duce,<sup>3</sup> Maria Rosaria Tinè<sup>3</sup> and Vincenzo Barone<sup>2</sup>

- 1) *Dipartimento di Scienze Chimiche e Geologiche, Università di Modena e Reggio-Emilia, via G. Campi 103, I-41125 Modena, Italy.*
- 2) *Scuola Normale Superiore di Pisa, Piazza dei Cavalieri 7, I-56126 Pisa, Italy.*
- 3) *Dipartimento di Chimica e Chimica Industriale, Università di Pisa, via Moruzzi 13, 56124, Pisa, Italy.*

**Table S1.** Full potential parameters for the ClayFF,<sup>1</sup> employed for both MM and MD calculations. Clay-water interactions were modeled according to the SPC water model.<sup>2</sup>

| <b>Non-bond parameters</b>            |                  |                   |                                                 |                            |
|---------------------------------------|------------------|-------------------|-------------------------------------------------|----------------------------|
| <i>Species</i>                        | <i>Symbol</i>    | <i>Charge (e)</i> | <i>D<sub>0</sub> (kcal/mol)</i>                 | <i>R<sub>0</sub> (Å)</i>   |
| water hydrogen                        | h*               | 0.4100            |                                                 |                            |
| hydroxyl hydrogen                     | ho               | 0.4250            |                                                 |                            |
| water oxygen                          | o*               | -0.8200           | 0.1554                                          | 3.5532                     |
| hydroxyl oxygen                       | oh               | -0.9500           | 0.1554                                          | 3.5532                     |
| bridging oxygen                       | ob               | -1.050            | 0.1554                                          | 3.5532                     |
| tetrahedral silicon                   | st               | 2.100             | 1.8405*10 <sup>-6</sup>                         | 3.7064                     |
| octahedral aluminum                   | ao               | 1.5750            | 1.3298*10 <sup>-6</sup>                         | 4.7943                     |
| <b>Bond Parameters – Bond Stretch</b> |                  |                   |                                                 |                            |
| <i>Species i</i>                      | <i>Species j</i> |                   | <i>k<sub>1</sub> (kcal/mol Å<sup>2</sup>)</i>   | <i>r<sub>0</sub> (Å)</i>   |
| o*                                    | h*               |                   | 554.1349                                        | 1.0000                     |
| oh                                    | ho               |                   | 554.1349                                        | 1.0000                     |
| ohs                                   | ho               |                   | 554.1349                                        | 1.0000                     |
| <b>Bond Parameters – Angle Bend</b>   |                  |                   |                                                 |                            |
| <i>Species i</i>                      | <i>Species j</i> | <i>Species k</i>  | <i>k<sub>2</sub> (kcal/mol rad<sup>2</sup>)</i> | <i>θ<sub>0</sub> (deg)</i> |
| h*                                    | o*               | h*                | 45.7696                                         | 109.47                     |
| Metal                                 | oh               | ho                | 30.0                                            | 109.47                     |
| Metal                                 | ohs              | ho                | 30.0                                            | 109.47                     |

**TABLE S2.** Full potential parameters for the PMMCS<sup>3</sup>, employed for MM calculations. Clay-water interactions were modeled according to the SPC water model.<sup>2</sup>

| <b>Potential parameters – Bond Stretch</b> |                           |                              |                              |                                            |                                |
|--------------------------------------------|---------------------------|------------------------------|------------------------------|--------------------------------------------|--------------------------------|
| <i>Species/symbol</i>                      | <i>Type</i>               | <i>Charge (e)</i>            | <i>Dij (eV)</i>              | <i>Aij (Å<sup>-2</sup>)</i>                | <i>R<sub>0</sub> (Å)</i>       |
| Al-O                                       | Morse                     | 1.8/-1.2                     | 0.361581                     | 1.900442                                   | 2.164818                       |
| Si-O                                       |                           | 2.4/-1.2                     | 0.340554                     | 2.006700                                   | 2.100000                       |
| O-O                                        |                           | -1.2/-1.2                    | 0.042395                     | 1.379316                                   | 3.618701                       |
| H-O                                        |                           | 0.6/-1.2                     | 0.4371659                    | 3.06430                                    | 1.245132                       |
| <b>Angle Bend</b>                          |                           |                              |                              |                                            |                                |
|                                            | <i>r<sub>12</sub> (Å)</i> | <i>r<sub>13</sub> (Å)</i>    | <i>r<sub>23</sub> (Å)</i>    | <i>k<sub>1</sub> (eV/ rad<sup>2</sup>)</i> | <i>θ<sub>0</sub> (deg)</i>     |
| Si-O-H                                     | 2.0                       | 1.2                          | 3.3                          | 2.4                                        | 90.0                           |
| <b>Non bond Parameters –Bond Stretch</b>   |                           |                              |                              |                                            |                                |
| <i>Species/symbol</i>                      | <i>Type</i>               | <i>A (kcal/mol)</i>          | <i>ρ (Å)</i>                 | <i>C (kcal/mol Å<sup>6</sup>)</i>          | <i>R<sub>min</sub> (Å)</i>     |
| Si···Owater                                | Buckingham                | 1049.880                     | 0.4                          | 0.0                                        | 0.0                            |
| H···Ow                                     |                           | 70.795                       | 0.266200                     | 0.0                                        | 0.0                            |
| O···Hw                                     |                           | 70.795                       | 0.245000                     | 0.0                                        | 0.0                            |
| O···Ow                                     |                           | 2840.780                     | 0.318112                     | 230.924                                    | 0.0                            |
| <b>Non bond Parameters – H-Bond*</b>       |                           |                              |                              |                                            |                                |
|                                            |                           | <i>A (eV/Å<sup>12</sup>)</i> | <i>B (eV/Å<sup>10</sup>)</i> | <i>r<sub>HO</sub> Max. (Å)</i>             | <i>r<sub>OO</sub> Max. (Å)</i> |
| O/Ow-H/Hw···Ow/O                           |                           | 20000                        | 0                            | 3.0                                        | 4.0                            |

\*: The H-bond interaction is evaluated by using the following formula:

$$U_{Hbond} = \sum_{\text{three-body}}^{O-H\cdots O} \left( \frac{A}{r_{OO}^{12}} - \frac{B}{r_{OO}^{10}} \right) \cos^4 \theta_{O-H\cdots O}$$

where  $\theta$  is the angle characterizing the H-bond atomic sequence O-H···O. When  $\theta > 90^\circ$  the energy angular term is that shown in the above equation, whereas it is set to zero when  $\theta < 90^\circ$ . The symbol is the distance between the two O atoms defining the O-H···O sequence.

**Table S3.** OH bonds and O(H)···O intermolecular distances, reported in Å. Absolute deviations in parentheses. Atoms labeling as given in Figure 1.

|                                 | ClayFF         | PMMCS          | B3LYP-D* <sup>a</sup> | B3LYP-D* <sup>b</sup> | B3LYP <sup>c</sup> | Exp. <sup>d</sup> |
|---------------------------------|----------------|----------------|-----------------------|-----------------------|--------------------|-------------------|
| <i>OH1</i>                      | 1.029 (0.054)  | 0.961 (-0.014) | 0.967 (-0.008)        | 0.971 (-0.004)        | 0.970 (-0.005)     | 0.975             |
| <i>OH2</i>                      | 1.029 (0.047)  | 0.959 (-0.023) | 0.961 (-0.021)        | 0.967 (-0.015)        | 0.967 (-0.015)     | 0.982             |
| <i>OH3</i>                      | 1.032 (0.056)  | 0.961 (-0.015) | 0.963 (-0.013)        | 0.967 (-0.009)        | 0.968 (-0.008)     | 0.976             |
| <i>OH4</i>                      | 1.033 (0.058)  | 0.962 (-0.013) | 0.962 (-0.013)        | 0.966 (-0.009)        | 0.967 (-0.008)     | 0.975             |
| <i>O2-O2'</i>                   | 2.908 (-0.180) | 2.857 (-0.231) | 2.951 (-0.137)        | 2.940 (-0.148)        | 3.126 (0.038)      | 3.088             |
| <i>O3-O3'</i>                   | 2.803 (-0.186) | 2.886 (-0.103) | 2.879 (-0.110)        | 2.946 (-0.043)        | 3.019 (0.030)      | 2.989             |
| <i>O4-O4'</i>                   | 2.760 (-0.193) | 2.817 (-0.136) | 2.837 (-0.116)        | 2.851 (-0.102)        | 2.964 (0.011)      | 2.953             |
| <i>Al1-OH1</i>                  | 2.045 (0.125)  | 2.059 (0.139)  | 1.942 (0.022)         | -                     | 1.926 (0.006)      | 1.920             |
| <i>Al1-OH2</i>                  | 1.909 (0.060)  | 1.899 (0.050)  | 1.863 (0.014)         | -                     | 1.862 0.013        | 1.849             |
| <i>Al1-OH3</i>                  | 1.898 (0.045)  | 1.907 (0.054)  | 1.861 (0.008)         | -                     | 1.860 0.007        | 1.853             |
| <i>Al1-OH4</i>                  | 1.878 (0.016)  | 1.970 (0.108)  | 1.859 (-0.003)        | -                     | 1.856 (-0.006)     | 1.862             |
| <i>Al2-OH1</i>                  | 2.079 (0.159)  | 2.072 (0.152)  | 1.945 (0.025)         | -                     | 1.925 0.005        | 1.920             |
| <i>Al2-OH2</i>                  | 1.890 (0.036)  | 1.896 (0.042)  | 1.862 (0.008)         | -                     | 1.864 0.010        | 1.854             |
| <i>Al2-OH3</i>                  | 1.890 (0.023)  | 1.879 (0.012)  | 1.853 (-0.014)        | -                     | 1.854 -0.013       | 1.867             |
| <i>Al2-OH4</i>                  | 1.869 (0.015)  | 1.861 (0.007)  | 1.853 (-0.001)        | -                     | 1.854 0.000        | 1.854             |
| <i>Si1-O1(oct.)<sup>e</sup></i> | 1.556 (-0.049) | 1.586 (-0.019) | 1.620 (0.015)         | -                     | 1.622 0.017        | 1.605             |
| <i>Si1-O2'</i>                  | 1.585 (-0.037) | 1.587 (-0.035) | 1.633 (0.011)         | -                     | 1.641 0.019        | 1.622             |
| <i>Si1-O3'</i>                  | 1.589 (-0.027) | 1.589 (-0.027) | 1.636 (0.020)         | -                     | 1.643 0.027        | 1.616             |
| <i>Si1-O4'</i>                  | 1.593 (-0.022) | 1.599 (-0.016) | 1.640 (0.025)         | -                     | 1.646 0.031        | 1.615             |
| <i>Si2-O2(oct.)<sup>e</sup></i> | 1.564 (-0.046) | 1.568 (-0.042) | 1.617 (0.007)         | -                     | 1.619 0.009        | 1.610             |
| <i>Si2-O2'</i>                  | 1.586 (-0.033) | 1.586 (-0.033) | 1.632 (0.013)         | -                     | 1.640 0.021        | 1.619             |
| <i>Si2-O3'</i>                  | 1.590 (-0.027) | 1.599 (-0.018) | 1.639 (0.022)         | -                     | 1.646 0.029        | 1.617             |
| <i>Si2-O4'</i>                  | 1.589 (-0.039) | 1.592 (-0.036) | 1.635 (0.007)         | -                     | 1.642 0.014        | 1.628             |

<sup>a</sup>: this work. ; <sup>b</sup>: from Ref.<sup>4</sup> ; <sup>c</sup>: from Ref.<sup>5</sup> ; <sup>d</sup>: from Ref.<sup>6</sup> ; <sup>e</sup>: oxygen shared with the Al octahedral site.

**TABLE S4.** Radial and angular parameters used in calculating hydrogen bond formation in the **Hal-10** system calculated from radial and angular OH distribution functions.

|                                         | $r_e$ (Å) | $r_{hw}$ (Å) | $a_e$ (degrees) | $a_{hw}$ (degrees) |
|-----------------------------------------|-----------|--------------|-----------------|--------------------|
| $O_{oct} - H_{oct} - OW$ <sup>a</sup> , | 1.77      | 0.150        | 8.50            | 2.45               |
| $O_{oct} - HW - OW$ <sup>a</sup>        | 1.80      | 0.175        | 8.50            | 2.60               |
| $O_{oct} - H_{oct} - OW$ <sup>b,c</sup> | 1.75      | 0.140        | 9.50            | 2.80               |
| $O_{oct} - HW - OW$ <sup>b,c</sup>      | 1.78      | 0.160        | 9.50            | 2.80               |
| $O_{oct} - H_{oct} - OW$ <sup>b,d</sup> | 1.79      | 0.150        | 9.50            | 2.80               |
| $O_{oct} - HW - OW$ <sup>b,d</sup>      | 1.81      | 0.155        | 9.50            | 2.80               |
| SPC <sup>e</sup>                        | 1.88      | 0.130        | 10.3            | 2.50               |

<sup>a</sup> upper slab

<sup>b</sup> lower slab

<sup>c</sup> excluding OH4

<sup>d</sup>OH4, lower slab

<sup>e</sup> water molecules between the two slabs

## Section S1 Halloysite structure.

The observed average RMSD of the heavy atoms in the Hal-single system reported in Figure S1 spans from a minimum of  $0.32 \pm 0.011$  Å for Si atoms to a maximum of  $0.38 \pm 0.010$  Å for hydroxyl groups located above in the octahedral layer (i.e. the OH2, OH3 and OH4 groups shown in Figure 1a of the main text). In all cases, the RMSD drift is very small (the maximum slope obtained by linear regression was  $3.01 \cdot 10^{-6}$  Å/ns for the O-H group), meaning that the clay structure is highly stable in the studied time window, with small oscillations around equilibrium positions (the maximum skewness obtained is 0.6 for bridging oxygen atoms). No local alterations of the clay structure were observed during the simulation; note that only the hydroxyl O-H bond is present in ClayFF, all other interactions being Coulombic or van der Waals.

Comparable results were obtained studying the Hal-10 system, although smaller absolute deviations are present, partially due to the reduced size of the two clay slabs. The results are shown in Figure S2 and no relevant differences are discernible between the upper and lower clay layer. The minimum RMSD is obtained for Si atoms ( $0.19$  Å) atoms and the maximum RMSD for octahedral hydroxyl groups ( $0.27$  Å), i.e. the same relative order as for the Hal-single system. The drift and asymmetries observable in the distribution are negligible.

Figure S3 shows the results obtained for the Hal-10 system using the SPC/E water model. Results are in line with those obtained with SPC: RMSD ranges from  $0.190$  Å (Si atoms in both slabs atoms) to  $0.42$  Å (hydroxyl oxygen atoms in the lower slab) with no observable drifts. This small increase in the structural disorder of the lower layer was caused by the partial dislocation of an Al atom and a nearby OH1 group which were shifted upwards by  $1.2$  Å at the beginning of the simulation and then remained stable in those distorted positions. No other deformation or defects of the halloysite clays were observed during the simulation.

**Figure S1.** RMSD of Al and Si atoms (upper panel) and hydroxyl (octahedral), bridging or tetrahedral oxygen atoms (lower panel) atoms as a function of time calculated from the Hal-single system. Histograms showing the distribution of RMSD values are reported on the right. “Octahedral” denotes the OH1-OH4 groups, “bridging” denotes the atoms joining the Al and Si layers and “octahedral” denotes the O2’, O3’ and O4’ atoms bound only to Si atoms (see Figure 1 of the main text). Note that in the left panels, the curves are drawn using a running average window five points wide (for clarity reasons) and that the actual width of distributions may be evaluated looking at the histograms on the right.

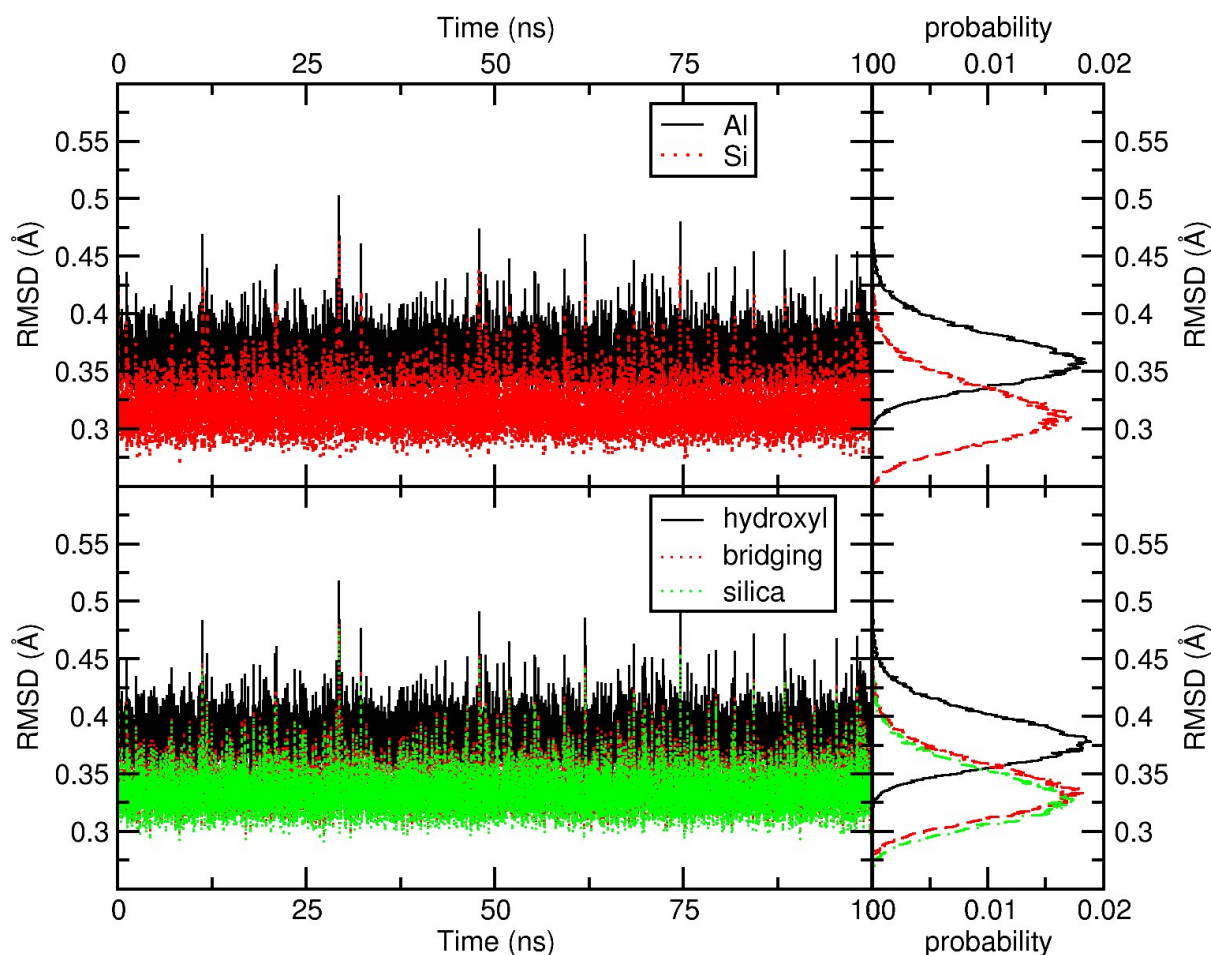

**Figure S2.** RMSD of Al and Si atoms (upper panel), tetrahedral and bridging (middle panel) and hydroxyl oxygen atoms (lower panel) atoms as a function of time calculated from the Hal-10 system. Note that only the results obtained from the upper panel trajectory are actually shown, while the results for the lower panel are summarized by a green (Al, octahedral and bridging oxygen atoms) or cyan (Si and tetrahedral oxygen atoms) dot-dashed line representing the average value. Histograms showing the distribution of RMSD values are displayed on the corresponding panels on the right, using the same colors.

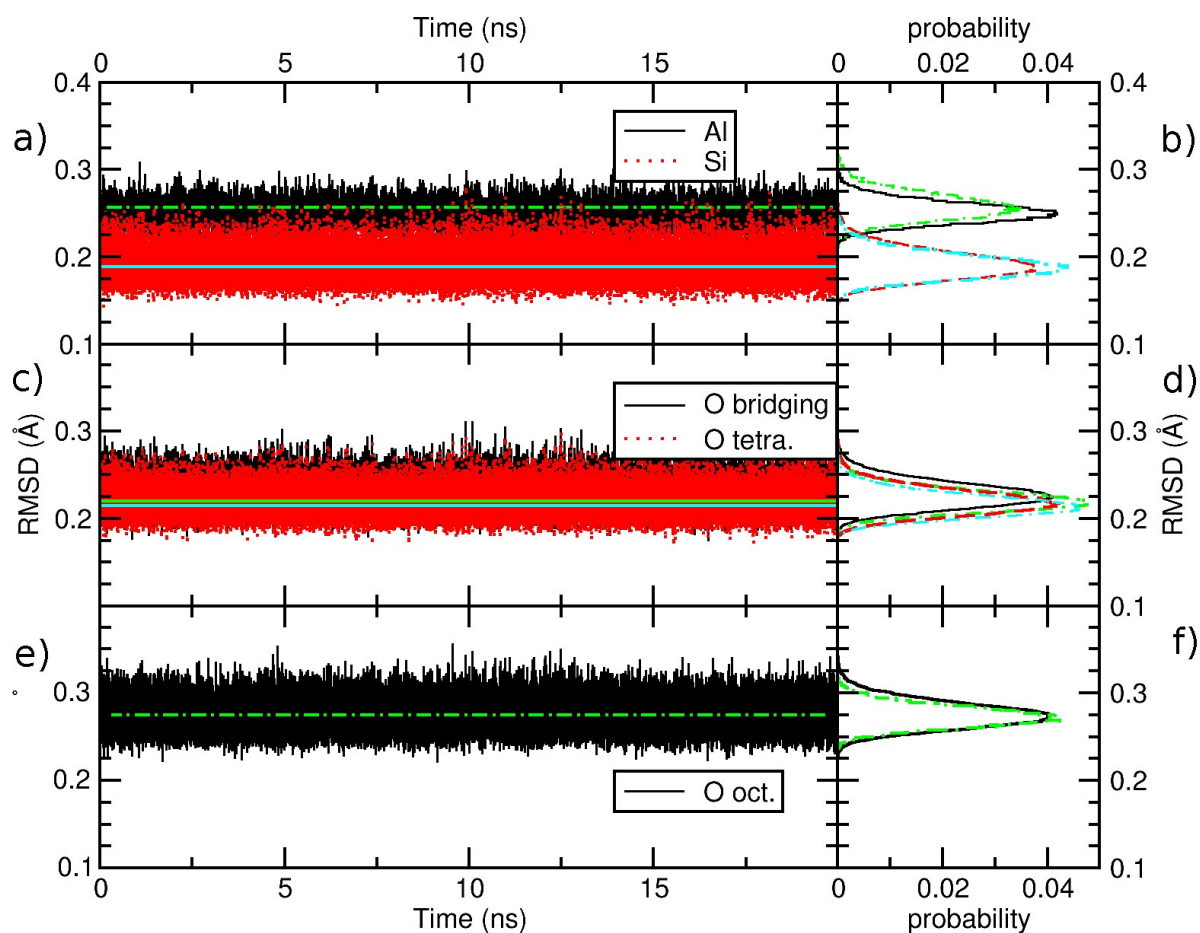



**Figure S3.** RMSD of Al and Si atoms (upper panel), tetrahedral and bridging (middle panel) and hydroxyl oxygen atoms (lower panel) atoms as a function of time calculated from the Hal-10 system using the SPC/E water model. Note that only the results obtained from the lower panel trajectory are actually shown, while the results for the upper panel are summarized by a green (Al, octahedral and bridging oxygen atoms) or cyan (Si and tetrahedral oxygen atoms) dot-dashed line representing the average value, with the exception of hydroxyl groups in the last panel. Histograms showing the distribution of RMSD values are displayed on the corresponding panels on the right, using the same colours.

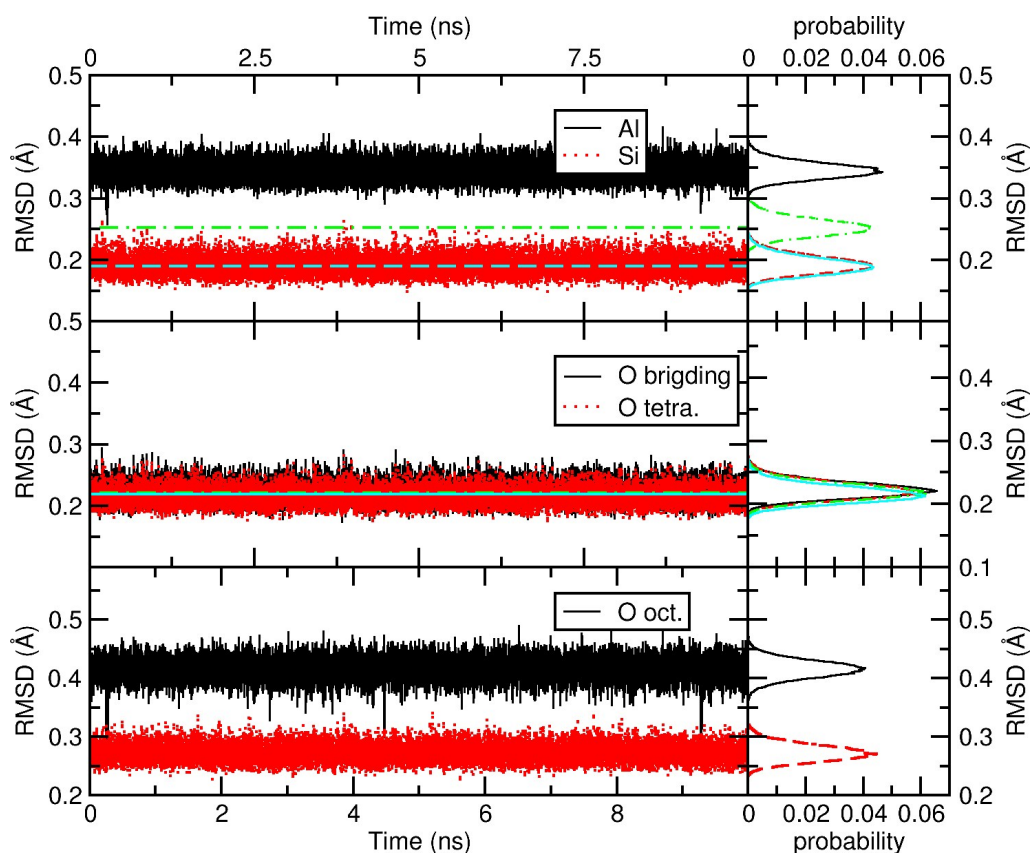

**Figure S4.** Upper panel: solvent density along the z axis in the Hal-10-SPC/E system. The dashed red line represents the density of SPC/E water (996 g/l), while the dashed green lines show the limits of the upper and lower clay slab. Lower panel: orientation of water molecules in the box. The average cosine of the z axis/ water dipole moment angle is shown.

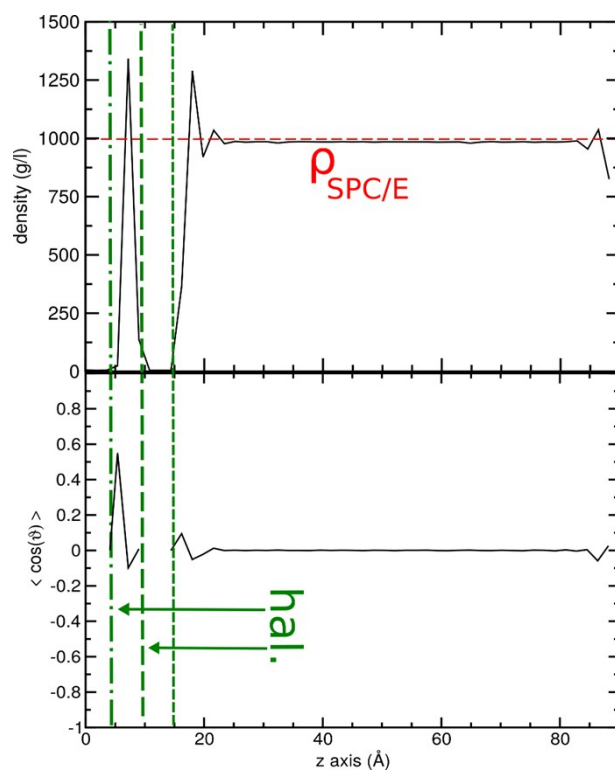

**Table S5.** Oxygen atom (water) residence times (in ps) for Hal-10 system.

|            |                           | <b>SPC</b> | <b>SPC/E</b> |
|------------|---------------------------|------------|--------------|
| Lower Slab | Lower Tetrahedral surface | 2.68       | 3.57         |
|            | Lower Octahedral surface  | 18.15      | 23.48        |
| Upper slab | Upper Tetrahedral surface | 17.22      | 23.14        |
|            | Upper Octahedral surface  | 11.56      | 16.29        |
|            | Water <sup>a</sup>        | 17.26      | 21.53        |
|            | Water <sup>b</sup>        | 2.04       | 2.88         |
|            | Water <sup>c</sup>        | 1.81       | 2.32         |

<sup>a</sup> between clay layers

<sup>b</sup> bulk

<sup>c</sup> between water molecules, in the first shell of hydroxyl clay atoms

## References

- 1 R. T. Cygan, J.-J. Liang and A. G. Kalinichev, *J. Phys. Chem. B*, 2004, **108**, 1255–1266.
- 2 H. J. C. Berendsen, J. P. M. Postma, W. F. van Gunsteren and J. Hermans, in *Intermolecular Forces*, ed. B. Pullman, Springer Netherlands, 1981, pp. 331–342.
- 3 A. Pedone, G. Malavasi, M. C. Menziani, A. N. Cormack and U. Segre, *J. Phys. Chem. B*, 2006, **110**, 11780–11795.
- 4 P. Ugliengo, C. M. Zicovich-Wilson, S. Tosoni and B. Civalleri, *J. Mater. Chem.*, 2009, **19**, 2564–2572.
- 5 S. Tosoni, K. Doll and P. Ugliengo, *Chem. Mater.*, 2006, **18**, 2135–2143.
- 6 R. B. Neder, M. Burghammer, T. Grasl, H. Schulz, A. Bram and S. Fiedler, *Clays Clay Miner.*, 1999, **47**, 487–494.
